# Supplementary material for: Development of a quantitative structure–activity relationship model for predicting quantum yield of hydroxyl radical generation from organic compounds
Source: Royal Society of Chemistry journal article supplement (doi:10.1039/d2em00396a), 2022-11-24
Supplement: d2em00396a1.pdf [file d2em00396a1.pdf]

## Appendix A. Supplementary material

### Development of a quantitative structure-activity relationship model for predicting quantum yield of hydroxyl radical generation from organic compounds

Yue Liu<sup>1,\*\*</sup>, Xiaobing Chen<sup>1,\*\*</sup>, Jianchen Zhao<sup>1</sup>, Wenjie Jin<sup>1</sup>, Kun Zhang<sup>1</sup>, Jiao Qu<sup>1</sup>, Ya-nan Zhang<sup>1,\*</sup>, Guangchao Chen<sup>2</sup>, Willie J.G.M. Peijnenburg<sup>2,3</sup>

1. State Environmental Protection Key Laboratory of Wetland Ecology and Vegetation Restoration, School of Environment, Northeast Normal University, Changchun 130117, China.
2. Institute of Environmental Sciences, Leiden University, Leiden, the Netherlands
3. National Institute of Public Health and the Environment (RIVM), Center for Safety of Substances and Products, Bilthoven, the Netherlands

-----  
\* Corresponding authors. Phone: +86-431-89165617; Fax: +86 431-89165610. E-mail: [zhangyn912@nenu.edu.cn](mailto:zhangyn912@nenu.edu.cn) (Y. Zhang)

\*\* These authors contributed equally to this work.

## Text S1

**Chemical Substances.** Methanol and acetonitrile (chromatographic pure) were purchased from TEDIA (Fairfield, OH, USA). Ultrapure water (PW, 18.2 M $\Omega$ ) was acquired from a purification system and used in all experiments.

## Text S2

**Calculation of light path length.** The light path length ( $z$ ) was calculated by equation (1).<sup>1</sup> The path length of light corresponded to the length of the respective chord of the circle to the cylindrical quartz tube.

$$z = \frac{\pi r^2}{2r} \quad (1)$$

Where  $r$  is the internal diameter of the cylindrical quartz tube.  $z$  is the average length of the chords.

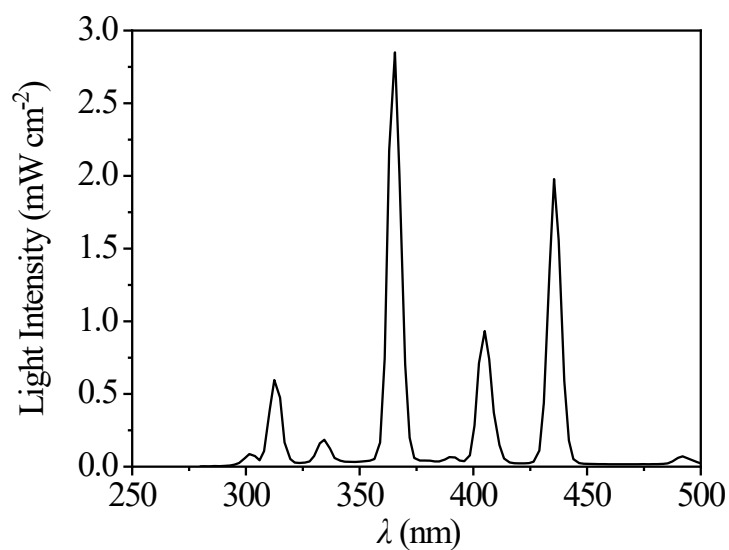

**Fig. S1.** The 500 W medium-pressure Hg lamp irradiation spectrum.

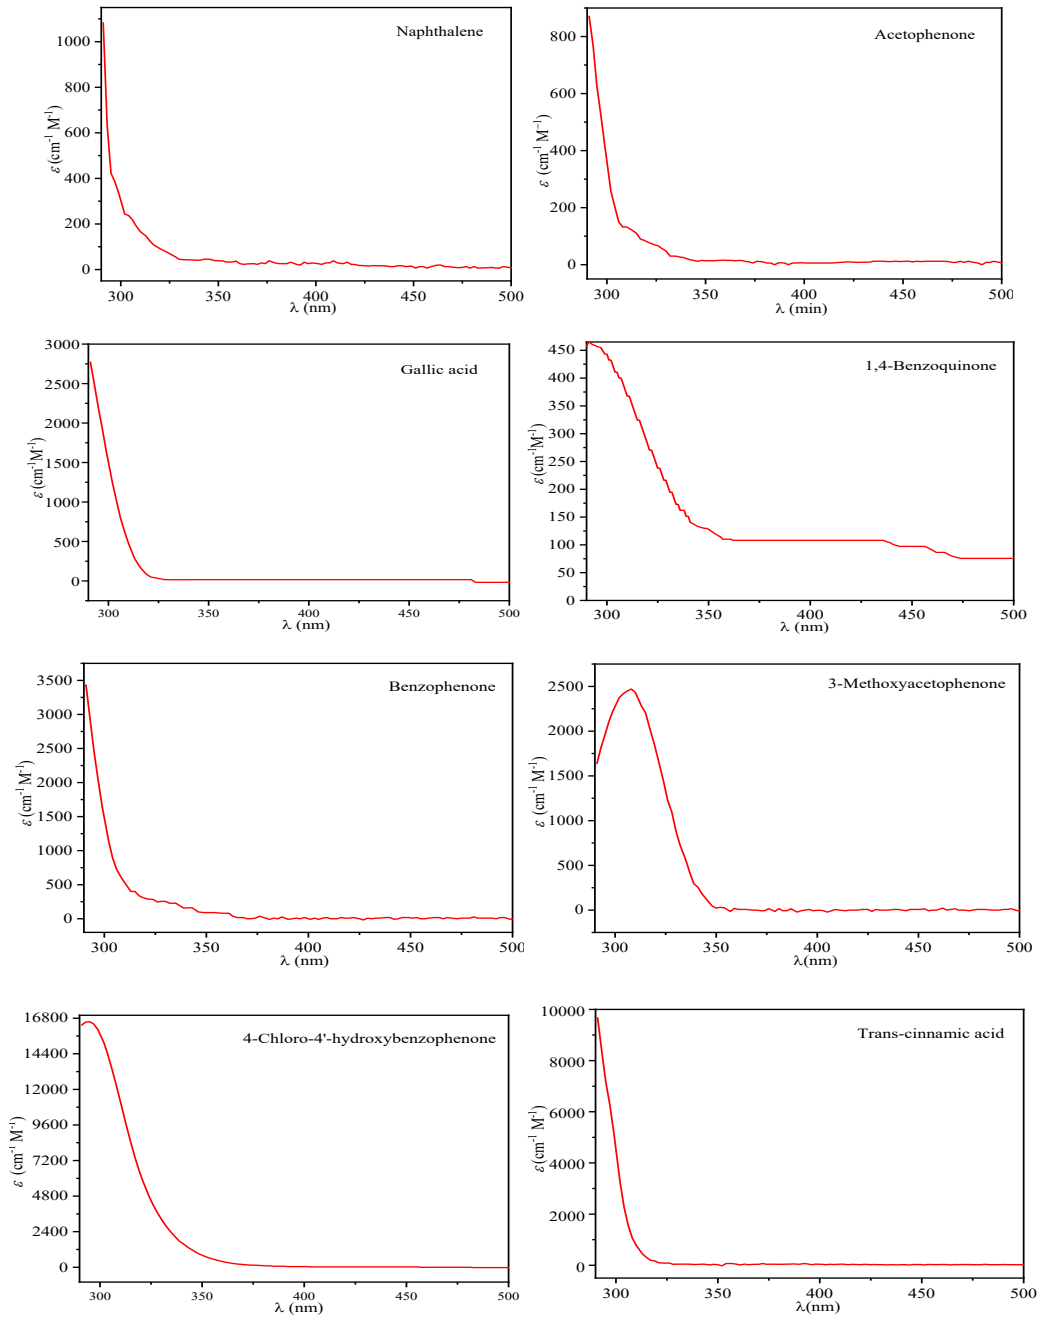

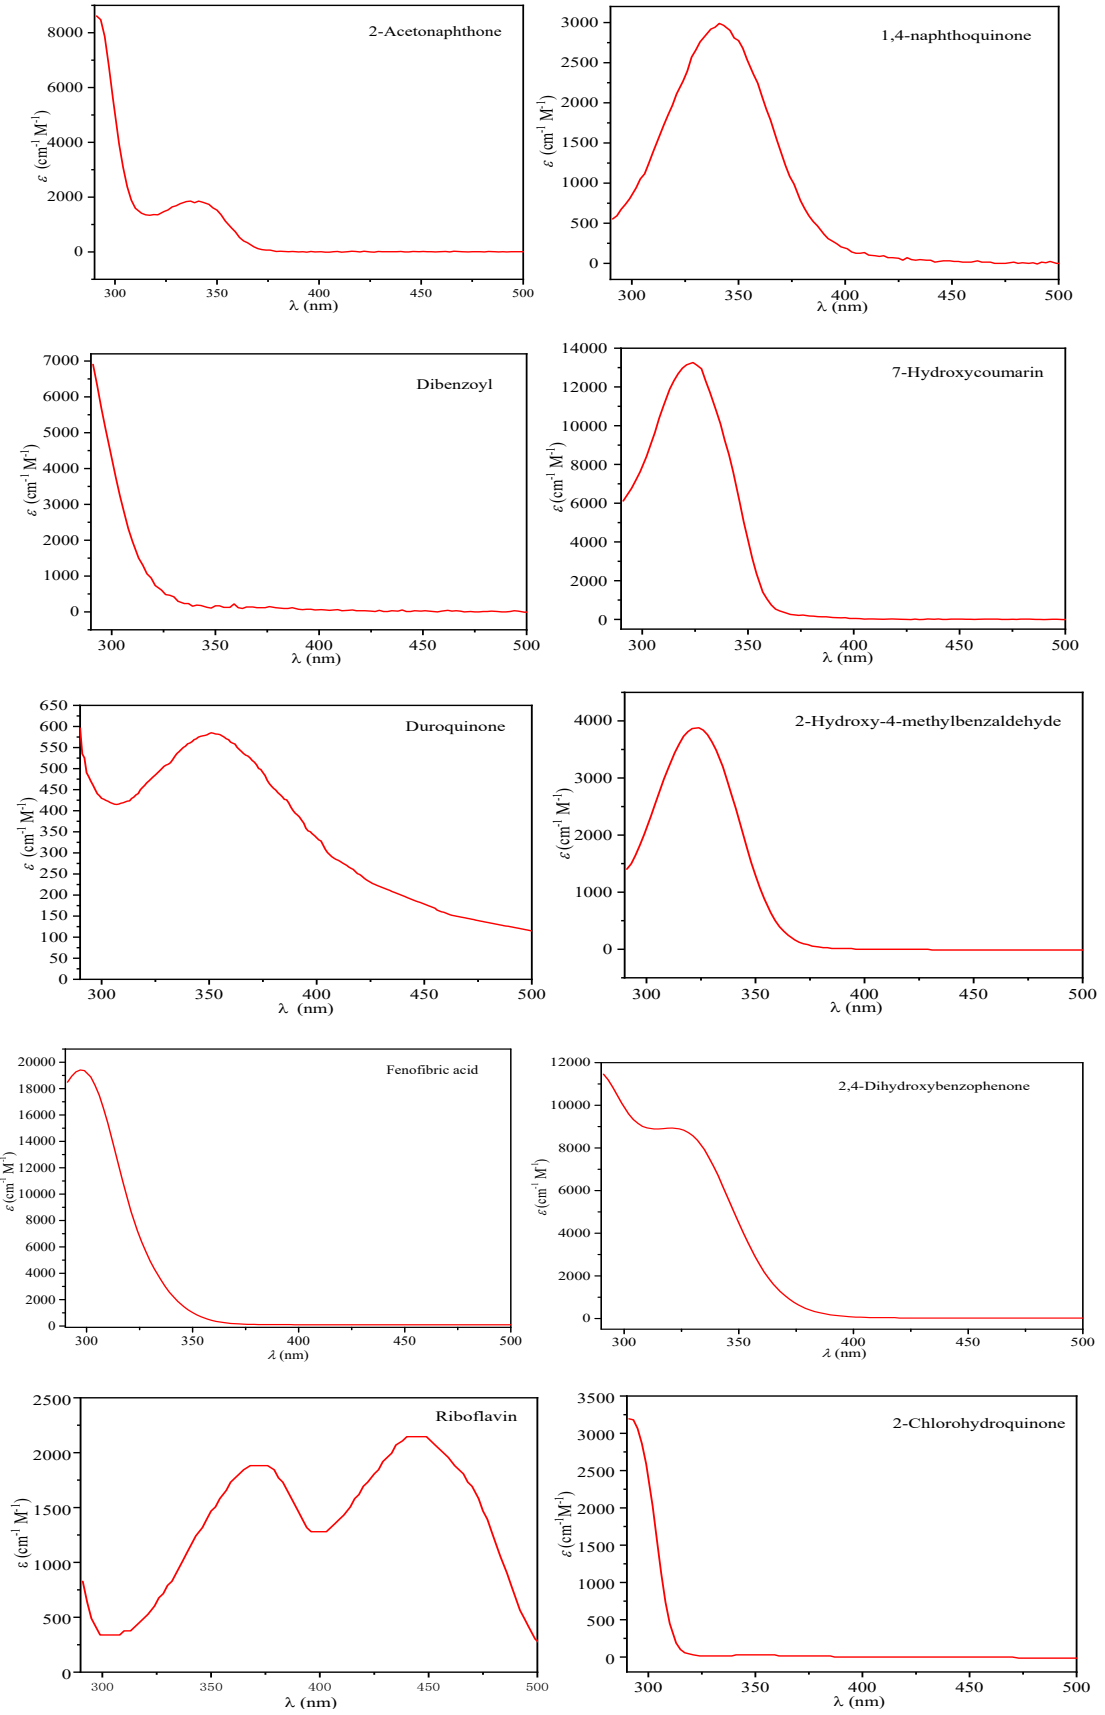

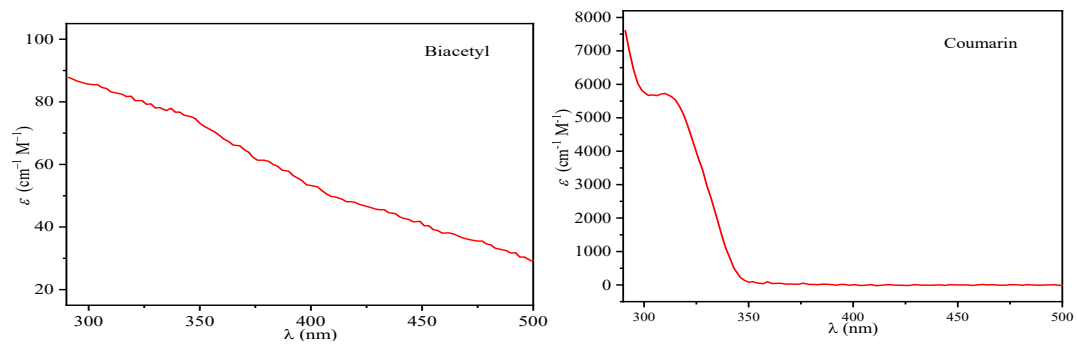

**Fig. S2.** UV-vis absorbance spectra of 20 organic compounds.

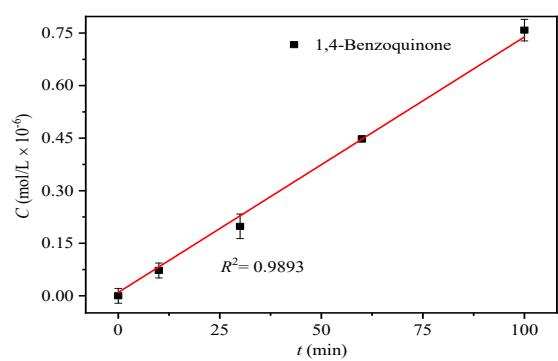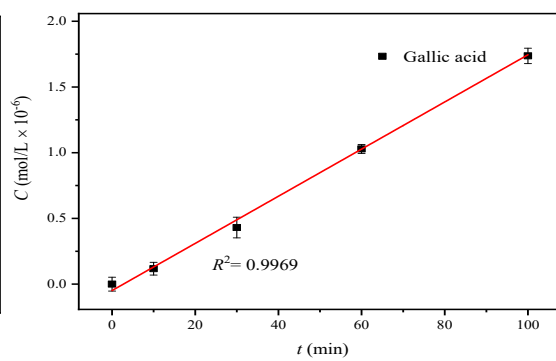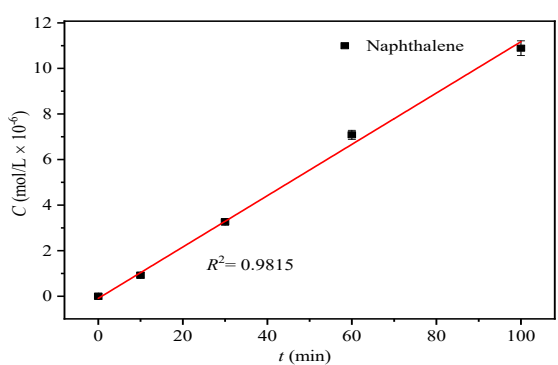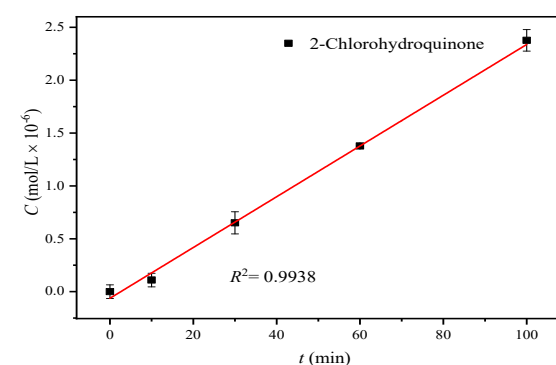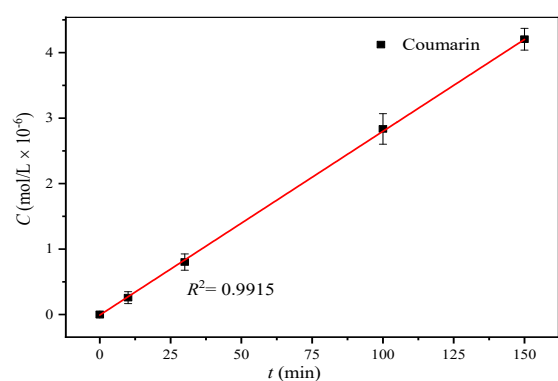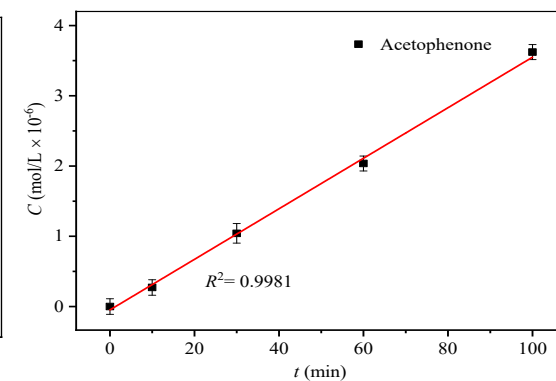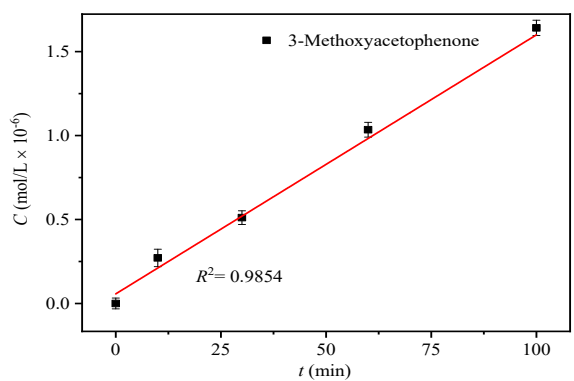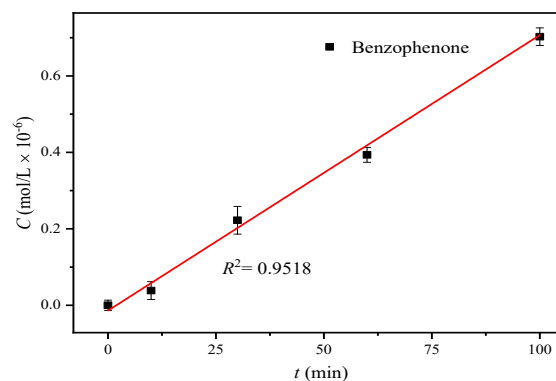

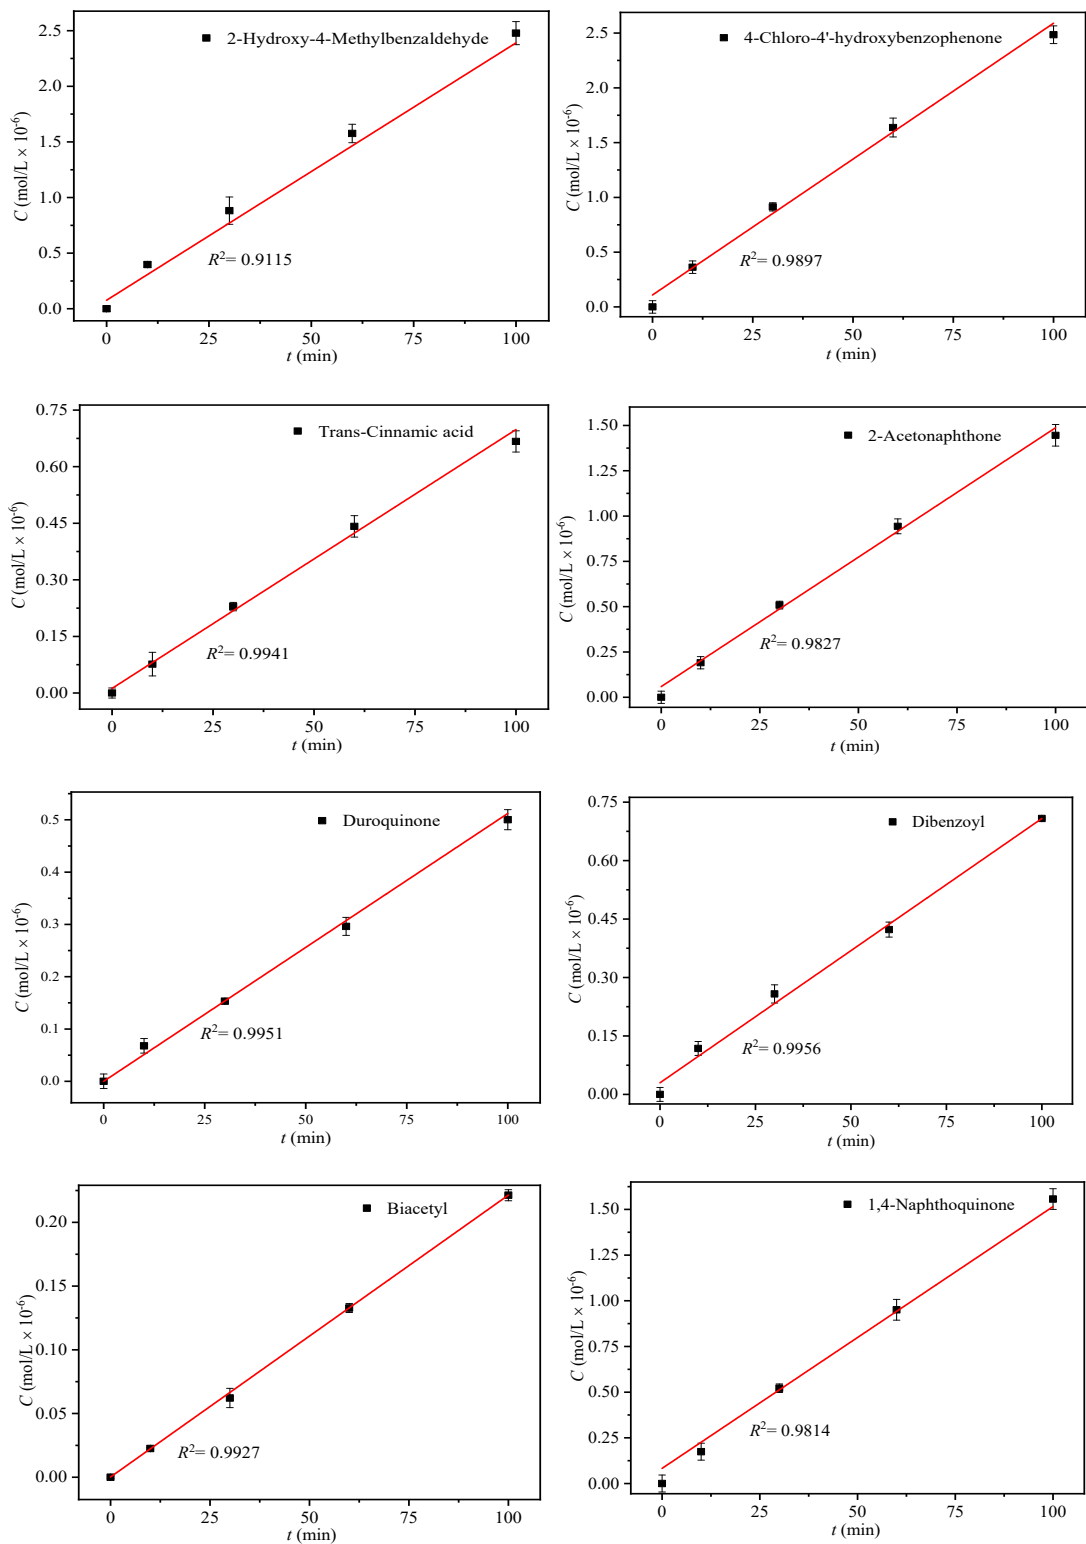

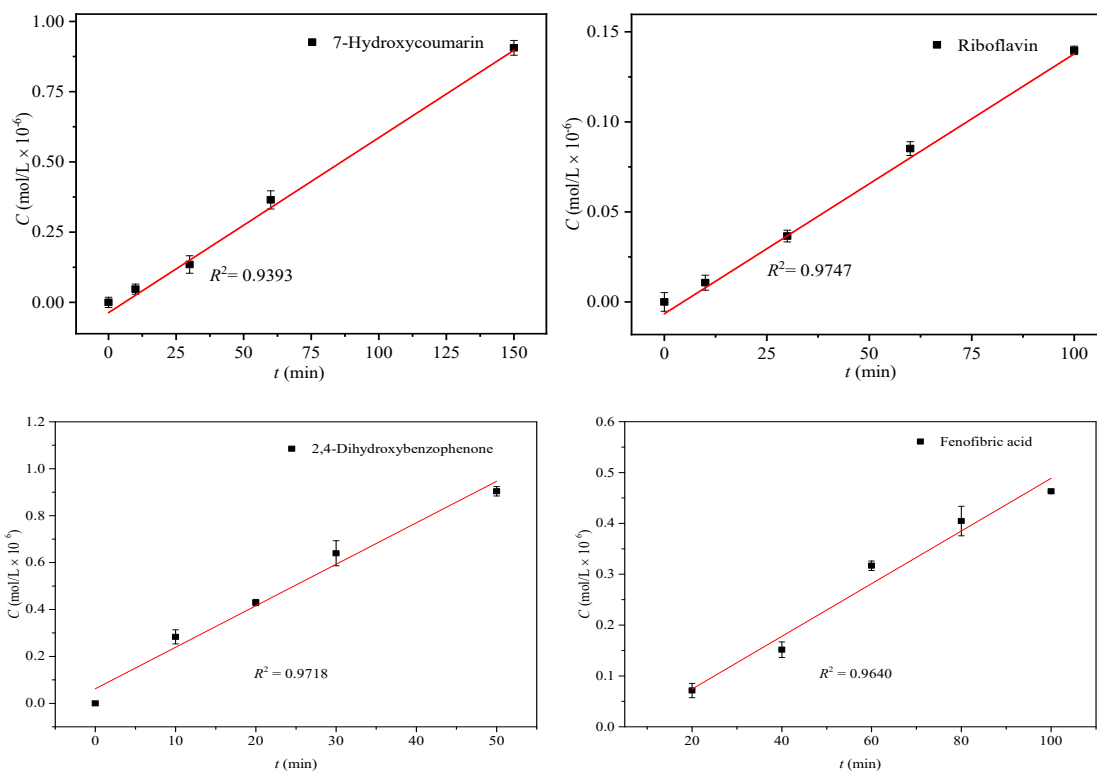

**Fig. S3.** The relationships between the concentration ( $C$ ) of phenol produced by the reaction of  $\bullet\text{OH}$  with benzene and the irradiation time (min) of organic compounds (the error bars represent the 95% confidence interval,  $n = 3$ ).



Table S1. Experimentally determined values of  $R_{\cdot\text{OH}}$  and  $[\cdot\text{OH}]_{\text{ss}}$  of organic compounds.

| Class               | Chemical name                   | $R_{\cdot\text{OH}} (\times 10^{-10} \text{ M/s})$ | $[\cdot\text{OH}]_{\text{ss}} (\times 10^{-17} \text{ M})$ |
|---------------------|---------------------------------|----------------------------------------------------|------------------------------------------------------------|
| <b>Class I</b>      | Naphthalene                     | $18.41 \pm 0.27$                                   | $7.79 \pm 0.46$                                            |
|                     | Acetophenone                    | $13.94 \pm 0.19$                                   | $5.89 \pm 0.29$                                            |
|                     | 2-Chlorohydroquinone            | $5.18 \pm 0.35$                                    | $2.18 \pm 0.19$                                            |
| -----               |                                 |                                                    |                                                            |
| <b>Class II</b>     | Gallic acid                     | $3.11 \pm 0.14$                                    | $1.31 \pm 0.07$                                            |
|                     | Coumarin                        | $6.29 \pm 0.18$                                    | $2.66 \pm 0.15$                                            |
|                     | 1,4-Benzoquinone                | $1.67 \pm 0.28$                                    | $0.71 \pm 0.19$                                            |
|                     | Benzophenone                    | $1.69 \pm 0.04$                                    | $0.72 \pm 0.09$                                            |
|                     | 3-Methoxyacetophenone           | $3.55 \pm 0.27$                                    | $1.50 \pm 0.17$                                            |
|                     | 4-Chloro-4'-hydroxybenzophenone | $4.92 \pm 0.31$                                    | $2.08 \pm 0.25$                                            |
|                     | 2-Hydroxy-4-methylbenzaldehyde  | $4.61 \pm 0.09$                                    | $1.94 \pm 0.33$                                            |
|                     | Trans-cinnamic acid             | $1.56 \pm 0.14$                                    | $0.66 \pm 0.18$                                            |
|                     | 2-Acetonaphthone                | $3.34 \pm 0.19$                                    | $1.42 \pm 0.27$                                            |
|                     | <b>Class III</b>                | Duroquinone                                        | $1.20 \pm 0.38$                                            |
| Dibenzoyl           |                                 | $1.48 \pm 0.25$                                    | $0.62 \pm 0.13$                                            |
| Biacetyl            |                                 | $0.61 \pm 0.14$                                    | $0.26 \pm 0.09$                                            |
| 1, 4-Naphthoquinone |                                 | $3.37 \pm 0.29$                                    | $1.42 \pm 0.08$                                            |
| 7-Hydroxycoumarin   |                                 | $1.67 \pm 0.37$                                    | $0.71 \pm 0.08$                                            |
| -----               |                                 |                                                    |                                                            |
|                     | 2,4-Dihydroxybenzophenone       | $4.16 \pm 0.30$                                    | $1.76 \pm 0.14$                                            |
|                     | Fenofibric acid                 | $1.16 \pm 0.08$                                    | $0.49 \pm 0.03$                                            |
|                     | Riboflavin                      | $4.24 \pm 0.29$                                    | $1.79 \pm 0.14$                                            |

**Table S2.** Values of the molecular structure descriptors used in the constructed QSAR model.

| Chemical name                   | <i>X4Av</i> | <i>Psi_i_t</i> | <i>Mor32s</i> |
|---------------------------------|-------------|----------------|---------------|
| 1, 4-Naphthoquinone             | 0.041       | 0.006          | -0.591        |
| Biacetyl                        | 0           | 0.042          | -0.947        |
| Dibenzoyl                       | 0.045       | 0.002          | -1.928        |
| Acetophenone                    | 0.056       | 0.028          | -0.987        |
| Coumarin                        | 0.04        | 0.012          | -1.2          |
| Trans-cinnamic acid             | 0.052       | 0.008          | 0.888         |
| 7-Hydroxycoumarin               | 0.037       | 0.005          | -1.462        |
| Naphthalene                     | 0.051       | 0.037          | 0.023         |
| Duroquinone                     | 0.052       | 0.008          | 0.878         |
| 2-Acetonaphthone                | 0.049       | 0.008          | -0.397        |
| 3-Methoxyacetophenone           | 0.05        | 0.012          | -0.836        |
| Benzophenone                    | 0.048       | 0.005          | -1.43         |
| 1,4-Benzoquinone                | 0.044       | 0.021          | 0.061         |
| 2-Chlorohydroquinone            | 0.052       | 0.013          | -1.373        |
| 2-Hydroxy-4-methylbenzaldehyde  | 0.047       | 0.013          | -0.787        |
| 4-Chloro-4'-hydroxybenzophenone | 0.047       | 0.001          | -1.86         |
| Gallic acid                     | 0.034       | 0.001          | -3.423        |
| Fenofibric acid                 | 0.045       | 0              | -0.685        |
| 2,4-Dihydroxybenzophenone       | 0.042       | 0.001          | -2.229        |
| Riboflavin                      | 0.041       | 0              | -1.895        |

## Reference

1. Y-N. Zhang, J. Wang, J. Chen, C. Zhou, Q. Xie, Phototransformation of 2,3-dibromopropyl-2,4,6-tribromophenyl ether (DPTE) in natural waters: Important roles of dissolved organic matter and chloride ion, *Environ. Sci. Technol.*, 2018, 52 (18), 10490-

10499.
